# Supplementary material for: Lifestyle Factors Associated with Undernutrition in Older People after the Great East Japan Earthquake: A Prospective Study in the Fukushima Health Management Survey
Source: Int J Environ Res Public Health. 2022 Mar 14;19(6):3399. doi: 10.3390/ijerph19063399 (PMC8951088; doi:10.3390/ijerph19063399)
Supplement: Supplementary file 1 [file ijerph-19-03399-s001.zip › ijerph-1553759-supplementary.pdf]

Supplemental Table S1. Multiple regression analysis with the change in BMI from baseline as the dependent variable

| Factor                                    | Reference                 | Multivariable adjustment<br>(Model1) * |          | Multivariable adjustment<br>(Model2) ** |          |
|-------------------------------------------|---------------------------|----------------------------------------|----------|-----------------------------------------|----------|
|                                           |                           | Standardized $\beta$                   | p values | Standardized $\beta$                    | p values |
| Sex (women)                               | Men                       | -0.110                                 | <0.001   | -0.110                                  | <0.01    |
| Age                                       | 1SD (6.2 years)           | -0.108                                 | <0.001   | -0.110                                  | <0.001   |
| Evacuation (no)                           | Yes                       | -0.466                                 | <0.001   | -0.466                                  | <0.001   |
| Exercise habits (<30min/2times/week)      | $\geq 30$ min/2times/week | 0.020                                  | 0.49     |                                         |          |
| Physical activities (<1hour/day)          | $\geq 1$ hour/day         |                                        |          | 0.004                                   | 0.89     |
| Smoking status (yes)                      | No                        | 0.240                                  | <0.001   | 0.240                                   | <0.001   |
| Drinking status (< 44g/day)               | Non-drinker               | 0.022                                  | 0.50     | 0.021                                   | 0.52     |
| ( $\geq 44$ g/day)                        | Non-drinker               | 0.029                                  | 0.67     | 0.029                                   | 0.67     |
| Meals before going to bed (< 3times/week) | $\geq 3$ times/week       | -0.164                                 | <0.001   | -0.165                                  | <0.001   |
| Digestive surgery (yes)                   | No                        | -0.101                                 | 0.08     | -0.102                                  | 0.08     |
| Lifestyle-related diseases (yes)          | No                        | 0.020                                  | 0.48     | 0.020                                   | 0.47     |
| Subjective symptoms (1 symptom)           | No symptom                | -0.052                                 | 0.17     | -0.051                                  | 0.18     |
| (2 or more symptoms)                      | No symptom                | -0.066                                 | 0.27     | -0.065                                  | 0.27     |

Dependent variable: change in BMI from baseline. Independent variable of interest: exercise habits or physical activity.

\* Model1 : Adjustment variables included in the model: age(continuous variable), sex, Evacuation, exercise habits, smoking status, drinking status, meals before going to bed, digestive surgery, lifestyle-related diseases, and subjective symptoms.

\*\* Model2 : Adjustment variables included in the model: age(continuous variable), sex, evacuation, physical activity, smoking status, drinking status, meals before going to bed, digestive surgery, lifestyle-related diseases, and subjective symptoms.

Supplemental Table S2. Comparison of the average change in BMI for each factor such as lifestyle factors

|                            |          | N      | Mean   | (SD)   | P      |
|----------------------------|----------|--------|--------|--------|--------|
| Evacuation                 | Yes      | 4,586  | 0.399  | (1.78) | <0.001 |
|                            | No       | 8,793  | -0.060 | (1.47) |        |
| Sex                        | Men      | 6,352  | 0.182  | (1.53) | <0.001 |
|                            | Women    | 7,027  | 0.021  | (1.65) |        |
| Age                        | >68      | 6,025  | 0.005  | (1.63) | <0.001 |
|                            | <68      | 7,354  | 0.173  | (1.56) |        |
| BMI <20kg/m <sup>2</sup>   | No       | 11,667 | 0.378  | (1.44) | <0.001 |
|                            | Yes      | 1,712  | -1.812 | (1.22) |        |
| BMI at baseline            | <Mean    | 6,483  | 0.154  | (1.54) | <0.001 |
|                            | >Mean    | 6,896  | 0.045  | (1.64) |        |
| Exercise habits            | Enough   | 4,427  | 0.091  | (1.58) | 0.3787 |
|                            | Poor     | 8,062  | 0.117  | (1.60) |        |
| Physical activities        | Enough   | 4,940  | 0.112  | (1.60) | 0.7773 |
|                            | Poor     | 7,556  | 0.104  | (1.59) |        |
| Smoking status             | No       | 11,617 | 0.054  | (1.58) | <0.001 |
|                            | Yes      | 1,762  | 0.382  | (1.66) |        |
| Drinking status            | No       | 7,553  | 0.037  | (1.64) | <0.001 |
|                            | <44g/day | 5,165  | 0.160  | (1.54) |        |
|                            | >44g/day | 661    | 0.300  | (1.51) |        |
| Meals before going to bed  | No       | 9,664  | 0.063  | (1.58) | <0.001 |
|                            | Yes      | 2,835  | 0.252  | (1.64) |        |
| Digestive surgery          | No       | 12,558 | 0.105  | (1.60) | 0.0404 |
|                            | Yes      | 821    | -0.013 | (1.52) |        |
| Lifestyle-related diseases | No       | 7,792  | 0.077  | (1.61) | 0.0801 |
|                            | Yes      | 5,587  | 0.126  | (1.57) |        |
| Subjective symptoms        | No       | 10,544 | 0.110  | (0.11) | 0.1978 |
|                            | 1        | 2,077  | 0.054  | (1.66) |        |
|                            | >1       | 758    | 0.040  | (1.69) |        |
